# Supplementary material
Source: publisher figshare collection journal article supplement (https://acs.figshare.com/ndownloader/files/3955195)
Supplement: Supplementary file 1 [file 3955195]

# Supporting Information

## Adhesion of Gels by silica particle

Hidekazu Abe<sup>1</sup>, Yusuke Hara<sup>2\*</sup>, Shingo Maeda<sup>3</sup>, and Shuji Hashimoto<sup>1</sup>

<sup>1</sup>Department of Applied Physics, Graduate School of Science and Engineering, Waseda University, 3-4-1 Okubo Shinjuku-ku, Tokyo 169-8555, Japan

<sup>2</sup>Nano System Research Institute (NRI), National Institute of Advanced Industrial Science and Technology (AIST), Central 5-2, 1-1-1 Higashi, Tsukuba 305-8565, Japan

<sup>3</sup>Department of Engineering Science and Mechanics, Shibaura Institute of Technology, 3-7-5 Toyosu Koto-ku, Tokyo 135-8548, Japan

\*To whom correspondence should be addressed.

E-mail: [y-hara@aist.go.jp](mailto:y-hara@aist.go.jp)

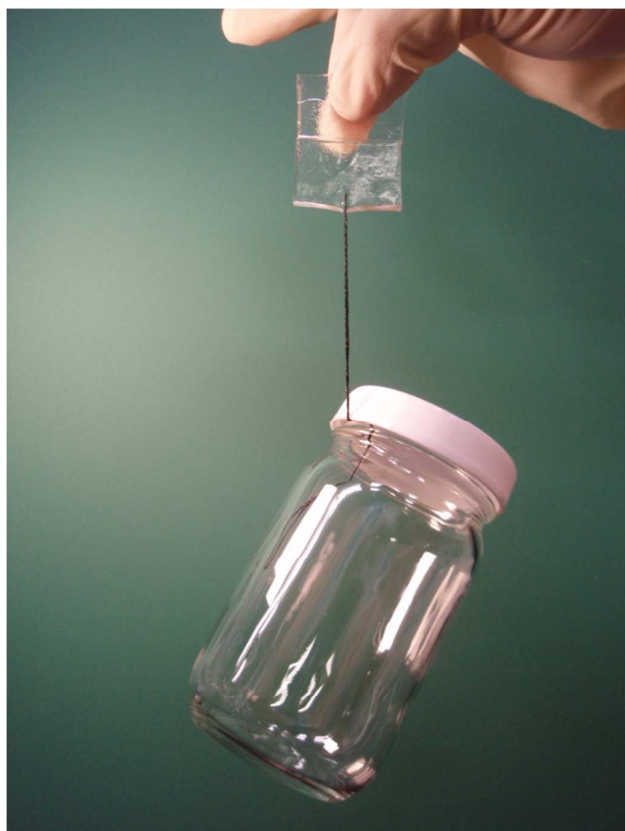

SI Figure 1. Photograph of adhesion between two cationic SI gels.
